# Supplementary material for: Specific vegetable types are associated with lower long-term risk for late-life dementia: the Perth Longitudinal Study of Aging Women
Source: Royal Society of Chemistry journal article supplement (doi:10.1039/d4fo03239j), 2024-01-01
Supplement: d4fo03239j1.pdf [file d4fo03239j1.pdf]

## **Specific vegetable types are associated with lower long-term risk for late-life dementia: the Perth Longitudinal Study of Aging Women**

### **Supplementary materials**

#### **Tables**

**Supplementary Table 1.** Hazard ratios (95% CI) for any late-life dementia events after truncation of follow-up to 13 years by quartiles of cruciferous and legume vegetables.

**Supplementary Table 2.** Hazard ratios (95% CI) for any late-life dementia events, hospitalisations, and deaths over 14.5 years by quartiles of vegetable intake including the additional adjustment for diet quality.

**Supplementary Table 3.** Hazard ratios (95% CI) for any late-life dementia events, hospitalisations, and deaths over 14.5 years by quartiles of yellow/orange/red vegetables intake further adjusted for non-yellow/orange/red vegetables intake.

**Supplementary Table 4.** Hazard ratios (95% CI) for any late-life dementia events, hospitalisations, and deaths over 14.5 years by categories of vegetable diversity.

**Supplementary Table 5.** Hazard ratios (95% CI) for any late-life dementia events, hospitalisations, and deaths over 14.5 years by quartiles of vegetable type intake including the additional adjustments for individual variables of the Framingham Risk Score.

#### **Figures**

**Supplementary Figure 1.** Hazard ratios (95% CI) for the relationship of the intake of (a) total vegetable, (b) yellow/orange/red vegetables, (c) cruciferous vegetables, (d) allium vegetables, (e) green leafy vegetables, and (f) legume vegetables with any late-life dementia hospitalisations over 14.5 years.

**Supplementary Figure 2.** Hazard ratios (95% CI) for the relationship of the intake of (a) total vegetable, (b) yellow/orange/red vegetables, (c) cruciferous vegetables, (d) allium vegetables, (e) green leafy vegetables, and (f) legume vegetables with any late-life dementia death over 14.5 years.

**Supplementary Table 1:** Hazard ratios (95% CI) for any late-life dementia events after truncation of follow-up to 13 years by quartiles of cruciferous and legume vegetables.

|               |  | Quartiles for intake of cruciferous vegetables |                  |                  |                  |
|---------------|--|------------------------------------------------|------------------|------------------|------------------|
|               |  | Q1                                             | Q2               | Q3               | Q4               |
|               |  | ≤16 g/d                                        | >16 – 28 g/d     | >28 – 44 g/d     | >44 g/d          |
| <i>Events</i> |  | Ref.                                           | 0.94 (0.67,1.31) | 0.99 (0.70,1.42) | 0.94 (0.62,1.42) |
|               |  | Quartiles for intake of legume vegetables      |                  |                  |                  |
|               |  | Q1                                             | Q2               | Q3               | Q4               |
|               |  | ≤15 g/d                                        | >15 – 24 g/d     | >24 – 36 g/d     | >36 g/d          |
| <i>Events</i> |  | Ref.                                           | 0.97 (0.71,1.32) | 0.92 (0.66,1.29) | 0.98 (0.64,1.51) |

Estimated hazard ratios and 95% CIs from Cox proportional hazards analysis, comparing the median intake of cruciferous and legume vegetables from each quartile compared to Q1. Multivariable-adjusted model for treatment code (calcium or placebo), Framingham Risk Score, apolipoprotein E genotype, energy intake, prescription of statin medications, use of low-dose aspirin, prevalent atherosclerotic vascular disease, physical activity, alcohol intake, socio-economic status.

**Supplementary Table 2:** Hazard ratios (95% CI) for any late-life dementia events, hospitalisations, and deaths over 14.5 years by quartiles of vegetable intake including the additional adjustment for diet quality.

|                           |  | Quartiles for intake of total vegetables             |                  |                         |                         |
|---------------------------|--|------------------------------------------------------|------------------|-------------------------|-------------------------|
|                           |  | Q1                                                   | Q2               | Q3                      | Q4                      |
|                           |  | ≤143 g/d                                             | >143 – 190 g/d   | >190 – 243 g/d          | >243 g/d                |
| <i>Late-life dementia</i> |  |                                                      |                  |                         |                         |
| <i>Deaths</i>             |  | Ref.                                                 | 0.84 (0.60,1.17) | 0.67 (0.41,1.09)        | 0.61 (0.32,1.15)        |
|                           |  | Quartiles for intake of yellow/orange/red vegetables |                  |                         |                         |
|                           |  | Q1                                                   | Q2               | Q3                      | Q4                      |
|                           |  | ≤33 g/d                                              | >33 – 48 g/d     | >48 – 68 g/d            | >68 g/d                 |
| <i>Events</i>             |  | Ref.                                                 | 0.93 (0.74,1.16) | <b>0.70 (0.52,0.95)</b> | <b>0.63 (0.42,0.94)</b> |
| <i>Hospitalisations</i>   |  | Ref.                                                 | 1.01 (0.79,1.30) | 0.75 (0.54,1.05)        | <b>0.64 (0.42,0.98)</b> |
| <i>Deaths</i>             |  | Ref.                                                 | 0.87 (0.62,1.24) | <b>0.60 (0.37,0.95)</b> | 0.56 (0.30,1.06)        |
|                           |  | Quartiles for intake of allium vegetables            |                  |                         |                         |
|                           |  | Q1                                                   | Q2               | Q3                      | Q4                      |
|                           |  | ≤3 g/d                                               | >3 – 6 g/d       | >6 – 11 g/d             | >11 g/d                 |
| <i>Events</i>             |  | Ref.                                                 | 0.84 (0.63,1.11) | 0.76 (0.57,1.02)        | 0.75 (0.51,1.09)        |
| <i>Deaths</i>             |  | Ref.                                                 | 0.82 (0.53,1.26) | 0.66 (0.41,1.04)        | 0.56 (0.30,1.03)        |
|                           |  | Quartiles for intake of green leafy vegetables       |                  |                         |                         |
|                           |  | Q1                                                   | Q2               | Q3                      | Q4                      |
|                           |  | ≤10 g/d                                              | >10 – 17 g/d     | >17 - 25.5 g/d          | >25.5 g/d               |
| <i>Deaths</i>             |  | Ref.                                                 | 0.87 (0.57,1.33) | <b>0.59 (0.36,0.97)</b> | 0.61 (0.34,1.10)        |

Estimated hazard ratios and 95% CIs from Cox proportional hazards analysis, comparing the median intake of total vegetable intake and vegetable types in quartiles (Q) 2, 3 and 4, with Q1. Bolded indicates p<0.05 compared to Q1. Multivariable-adjusted for treatment code (calcium or placebo), apolipoprotein E genotype, general Framingham Risk Score, energy intake, prescription of statin medications, use of low-dose aspirin, prevalent atherosclerotic vascular disease, physical activity, alcohol intake, socio-economic status), plus Dietary Guideline Index (DGI). Excludes energy and alcohol intake as these are included in the DGI score.

**Supplementary Table 3:** Hazard ratios (95% CI) for any late-life dementia events, hospitalisations, and deaths over 14.5 years by quartiles of yellow/orange/red vegetables intake further adjusted for non-yellow/orange/red vegetables intake.

| Late-life dementia      | Quartiles for intake of yellow/orange/red vegetables |                    |                         |                         |
|-------------------------|------------------------------------------------------|--------------------|-------------------------|-------------------------|
|                         | Q1<br>≤33 g/d                                        | Q2<br>>33 – 48 g/d | Q3<br>>48 – 68 g/d      | Q4<br>>68 g/d           |
| <i>Events</i>           | Ref.                                                 | 0.88 (0.70,1.12)   | <b>0.64 (0.46,0.88)</b> | <b>0.55 (0.36,0.84)</b> |
| <i>Hospitalisations</i> | Ref.                                                 | 0.95 (0.74,1.24)   | <b>0.67 (0.48,0.95)</b> | <b>0.53 (0.34,0.84)</b> |
| <i>Deaths</i>           | Ref.                                                 | 0.88 (0.61,1.27)   | 0.60 (0.36,1.00)        | 0.59 (0.29,1.17)        |

Estimated hazard ratios and 95% CIs from Cox proportional hazards analysis, comparing the median intake of yellow/orange/red vegetable intake in quartiles (Q) 2, 3 and 4, with Q1. Bolded indicates  $p < 0.05$  compared to Q1. Multivariable-adjusted for treatment code (calcium or placebo), apolipoprotein E genotype, general Framingham Risk Score, energy intake, prescription of statin medications, use of low-dose aspirin, prevalent atherosclerotic vascular disease, physical activity, alcohol intake, socio-economic status plus non-yellow/orange/red vegetable intake.

**Supplementary Table 4:** Hazard ratios (95% CI) for any late-life dementia events, hospitalisations, and deaths over 14.5 years by

categories of vegetable diversity.

|                         |               | Vegetable diversity (number of different vegetables consumed each day) |                    |                    |
|-------------------------|---------------|------------------------------------------------------------------------|--------------------|--------------------|
|                         |               | ≤3                                                                     | 4                  | ≥5                 |
| Late-life dementia      | Events, n (%) | 75 (19.3)                                                              | 61 (16.2)          | 71 (16.1)          |
| <i>Events</i>           | Model 1       | Ref.                                                                   | 0.76 (0.54 – 1.06) | 0.82 (0.59 – 1.13) |
|                         | Model 2       | Ref.                                                                   | 0.73 (0.52 – 1.04) | 0.78 (0.56 – 1.10) |
| <i>Hospitalisations</i> | Model 1       | Ref.                                                                   | 0.76 (0.52 – 1.09) | 0.87 (0.61 – 1.23) |
|                         | Model 2       | Ref.                                                                   | 0.74 (0.51 – 1.07) | 0.85 (0.59 – 1.21) |
| <i>Deaths</i>           | Model 1       | Ref.                                                                   | 0.66 (0.38 – 1.12) | 0.68 (0.41 – 1.14) |
|                         | Model 2       | Ref.                                                                   | 0.65 (0.38 – 1.13) | 0.67 (0.40 – 1.14) |

Estimated hazard ratios and 95% CIs from Cox proportional hazards analysis for late-life dementia events, hospitalisation, and deaths by vegetable diversity intakes. Model 1: Multivariable adjusted for treatment code (calcium or placebo), Framingham Risk Score and apolipoprotein E genotype. Model 2: Model 1 plus energy intake, prescription of statin medications, use of low-dose aspirin, prevalent atherosclerotic vascular disease, physical activity, alcohol intake, and socio-economic status.

**Supplementary Table 5:** Hazard ratios (95% CI) for any late-life dementia events, hospitalisations, and deaths over 14.5 years by quartiles of

vegetable type intake including the additional adjustments for individual variables of the Framingham Risk Score.

|                         |                | Quartiles for intake of total vegetables             |                  |                         |                         |
|-------------------------|----------------|------------------------------------------------------|------------------|-------------------------|-------------------------|
|                         |                | Q1                                                   | Q2               | Q3                      | Q4                      |
|                         |                | ≤143 g/d                                             | >143 – 190 g/d   | >190 – 243 g/d          | >243 g/d                |
| Late-life dementia      | Events, n (%)  | 61 (20.1)                                            | 50 (16.6)        | 49 (16.3)               | 47 (15.7)               |
| <i>Events</i>           | <i>Model 1</i> | Ref.                                                 | 0.90 (0.72,1.11) | 0.78 (0.58,1.05)        | 0.74 (0.51,1.08)        |
|                         | <i>Model 2</i> | Ref.                                                 | 0.88 (0.70,1.10) | 0.77 (0.56,1.06)        | 0.71 (0.48,1.06)        |
| <i>Hospitalisations</i> | <i>Model 1</i> | Ref.                                                 | 0.98 (0.76,1.25) | 0.82 (0.59,1.13)        | 0.74 (0.50,1.10)        |
|                         | <i>Model 2</i> | Ref.                                                 | 0.97 (0.76,1.25) | 0.83 (0.59,1.17)        | 0.75 (0.48,1.15)        |
| <i>Deaths</i>           | <i>Model 1</i> | Ref.                                                 | 0.83 (0.60,1.15) | <b>0.62 (0.39,0.99)</b> | <b>0.53 (0.29,0.97)</b> |
|                         | <i>Model 2</i> | Ref.                                                 | 0.82 (0.59,1.14) | <b>0.60 (0.37,0.99)</b> | 0.52 (0.28,1.00)        |
|                         |                | Quartiles for intake of yellow/orange/red vegetables |                  |                         |                         |
|                         |                | Q1                                                   | Q2               | Q3                      | Q4                      |
|                         |                | ≤33 g/d                                              | >33 – 48 g/d     | >48 – 68 g/d            | >68 g/d                 |
|                         | Events, n (%)  | 58 (19.2)                                            | 61 (20.1)        | 47 (15.6)               | 41 (13.7)               |
| <i>Events</i>           | <i>Model 1</i> | Ref.                                                 | 0.94 (0.75,1.18) | <b>0.66 (0.49,0.88)</b> | <b>0.57 (0.39,0.82)</b> |
|                         | <i>Model 2</i> | Ref.                                                 | 0.93 (0.74,1.18) | <b>0.64 (0.47,0.87)</b> | <b>0.54 (0.36,0.80)</b> |
| <i>Hospitalisations</i> | <i>Model 1</i> | Ref.                                                 | 1.01 (0.79,1.30) | <b>0.70 (0.51,0.96)</b> | <b>0.56 (0.37,0.84)</b> |
|                         | <i>Model 2</i> | Ref.                                                 | 1.02 (0.79,1.31) | <b>0.69 (0.50,0.97)</b> | <b>0.54 (0.35,0.83)</b> |
| <i>Deaths</i>           | <i>Model 1</i> | Ref.                                                 | 0.88 (0.63,1.25) | <b>0.55 (0.35,0.88)</b> | <b>0.50 (0.27,0.91)</b> |
|                         | <i>Model 2</i> | Ref.                                                 | 0.90 (0.63,1.29) | <b>0.55 (0.34,0.89)</b> | <b>0.49 (0.26,0.93)</b> |
|                         |                | Quartiles for intake of cruciferous vegetables       |                  |                         |                         |
|                         |                | Q1                                                   | Q2               | Q3                      | Q4                      |
|                         |                | ≤16 g/d                                              | >16 – 28 g/d     | >28 – 44 g/d            | >44 g/d                 |
|                         | Events, n (%)  | 56 (18.5)                                            | 56 (18.5)        | 51 (17)                 | 43 (14.4)               |
| <i>Events</i>           | <i>Model 1</i> | Ref.                                                 | 0.90 (0.67,1.21) | 0.84 (0.62,1.14)        | 0.76 (0.53,1.09)        |
|                         | <i>Model 2</i> | Ref.                                                 | 0.93 (0.69,1.24) | 0.88 (0.65,1.20)        | 0.79 (0.54,1.15)        |
| <i>Hospitalisations</i> | <i>Model 1</i> | Ref.                                                 | 0.90 (0.66,1.24) | 0.89 (0.64,1.23)        | 0.83 (0.57,1.23)        |
|                         | <i>Model 2</i> | Ref.                                                 | 0.94 (0.69,1.29) | 0.96 (0.68,1.33)        | 0.90 (0.61,1.34)        |
| <i>Deaths</i>           | <i>Model 1</i> | Ref.                                                 | 0.75 (0.49,1.15) | 0.67 (0.42,1.06)        | 0.56 (0.32,1.00)        |
|                         | <i>Model 2</i> | Ref.                                                 | 0.78 (0.51,1.19) | 0.69 (0.43,1.11)        | 0.59 (0.33,1.06)        |
|                         |                | Quartiles for intake of allium vegetables            |                  |                         |                         |

|                                                |                | Q1        | Q2               | Q3                      | Q4                      |
|------------------------------------------------|----------------|-----------|------------------|-------------------------|-------------------------|
|                                                |                | ≤3 g/d    | >3 – 6 g/d       | >6 – 11 g/d             | >11 g/d                 |
| Events, n (%)                                  |                | 65 (20.7) | 50 (17.2)        | 44 (14.6)               | 48 (16.1)               |
| <i>Events</i>                                  | <i>Model 1</i> | Ref.      | 0.87 (0.66,1.15) | 0.80 (0.60,1.06)        | 0.77 (0.54,1.12)        |
|                                                | <i>Model 2</i> | Ref.      | 0.86 (0.65,1.13) | 0.75 (0.56,1.01)        | 0.69 (0.47,1.03)        |
| <i>Hospitalisations</i>                        | <i>Model 1</i> | Ref.      | 0.84 (0.62,1.12) | 0.83 (0.61,1.13)        | 0.85 (0.57,1.25)        |
|                                                | <i>Model 2</i> | Ref.      | 0.82 (0.61,1.11) | 0.78 (0.57,1.07)        | 0.77 (0.51,1.17)        |
| <i>Deaths</i>                                  | <i>Model 1</i> | Ref.      | 0.89 (0.58,1.37) | 0.70 (0.44,1.11)        | 0.57 (0.31,1.04)        |
|                                                | <i>Model 2</i> | Ref.      | 0.87 (0.56,1.34) | 0.70 (0.43,1.12)        | 0.57 (0.30,1.09)        |
| Quartiles for intake of green leafy vegetables |                |           |                  |                         |                         |
|                                                |                | Q1        | Q2               | Q3                      | Q4                      |
|                                                |                | ≤10 g/d   | >10 – 17 g/d     | >17 - 25.5 g/d          | >25.5 g/d               |
| Events, n (%)                                  |                | 58 (19.1) | 54 (18.1)        | 44 (14.5)               | 51 (17)                 |
| <i>Events</i>                                  | <i>Model 1</i> | Ref.      | 0.99 (0.75,1.30) | 0.84 (0.62,1.15)        | 0.81 (0.56,1.15)        |
|                                                | <i>Model 2</i> | Ref.      | 0.97 (0.74,1.27) | 0.82 (0.60,1.12)        | 0.80 (0.56,1.16)        |
| <i>Hospitalisations</i>                        | <i>Model 1</i> | Ref.      | 1.06 (0.78,1.42) | 0.87 (0.63,1.22)        | 0.80 (0.55,1.17)        |
|                                                | <i>Model 2</i> | Ref.      | 1.02 (0.76,1.37) | 0.84 (0.60,1.18)        | 0.80 (0.54,1.17)        |
| <i>Deaths</i>                                  | <i>Model 1</i> | Ref.      | 0.89 (0.59,1.35) | <b>0.55 (0.34,0.90)</b> | <b>0.52 (0.29,0.93)</b> |
|                                                | <i>Model 2</i> | Ref.      | 0.89 (0.59,1.35) | <b>0.54 (0.33,0.88)</b> | <b>0.52 (0.29,0.94)</b> |
| Quartiles for intake of legume vegetables      |                |           |                  |                         |                         |
|                                                |                | Q1        | Q2               | Q3                      | Q4                      |
|                                                |                | ≤15 g/d   | >15 – 24 g/d     | >24 - 36 g/d            | >36 g/d                 |
| Events, n (%)                                  |                | 51 (16.8) | 49 (16.2)        | 59 (19.5)               | 28 (16.1)               |
| <i>Events</i>                                  | <i>Model 1</i> | Ref.      | 1.01 (0.78,1.32) | 0.97 (0.73,1.28)        | 0.96 (0.67,1.39)        |
|                                                | <i>Model 2</i> | Ref.      | 1.01 (0.77,1.32) | 0.92 (0.68,1.23)        | 0.86 (0.58,1.27)        |
| <i>Hospitalisations</i>                        | <i>Model 1</i> | Ref.      | 1.01 (0.76,1.34) | 1.00 (0.73,1.35)        | 1.04 (0.70,1.53)        |
|                                                | <i>Model 2</i> | Ref.      | 1.00 (0.75,1.34) | 0.95 (0.70,1.31)        | 0.95 (0.63,1.43)        |
| <i>Deaths</i>                                  | <i>Model 1</i> | Ref.      | 1.28 (0.83,1.98) | 0.93 (0.58,1.50)        | 0.68 (0.37,1.26)        |
|                                                | <i>Model 2</i> | Ref.      | 1.35 (0.86,2.11) | 0.91 (0.56,1.50)        | 0.62 (0.33,1.18)        |

Estimated hazard ratios and 95% CIs from Cox proportional hazards analysis, comparing the median intake of total vegetable and vegetable types from each quartile with Q1. Median intake of vegetables (in g/day) for Quartiles 1- 4 was: total vegetables (112.3, 168.2, 213.9, 284.3), yellow/orange/red (23.55, 40.70, 56.80, 86.05), cruciferous (9.20, 22.80, 35, 57.65), allium (1.60, 4.80, 8.45, 14.60), green leafy vegetables

---

(5.80, 13.40, 20.90, 32.35), and legumes (10.20, 19.40, 28.90, 47.28) respectively. Bolded indicates  $p < 0.05$  compared to Q1. Model 1: treatment code (calcium or placebo), age, BMI, and apolipoprotein E genotype. Model 2: Model 1 plus energy intake, prescription of statin medications, use of low-dose aspirin, previous diabetes, systolic blood pressure, prevalent atherosclerotic vascular disease, physical activity, alcohol intake, smoking status, socio-economic status.



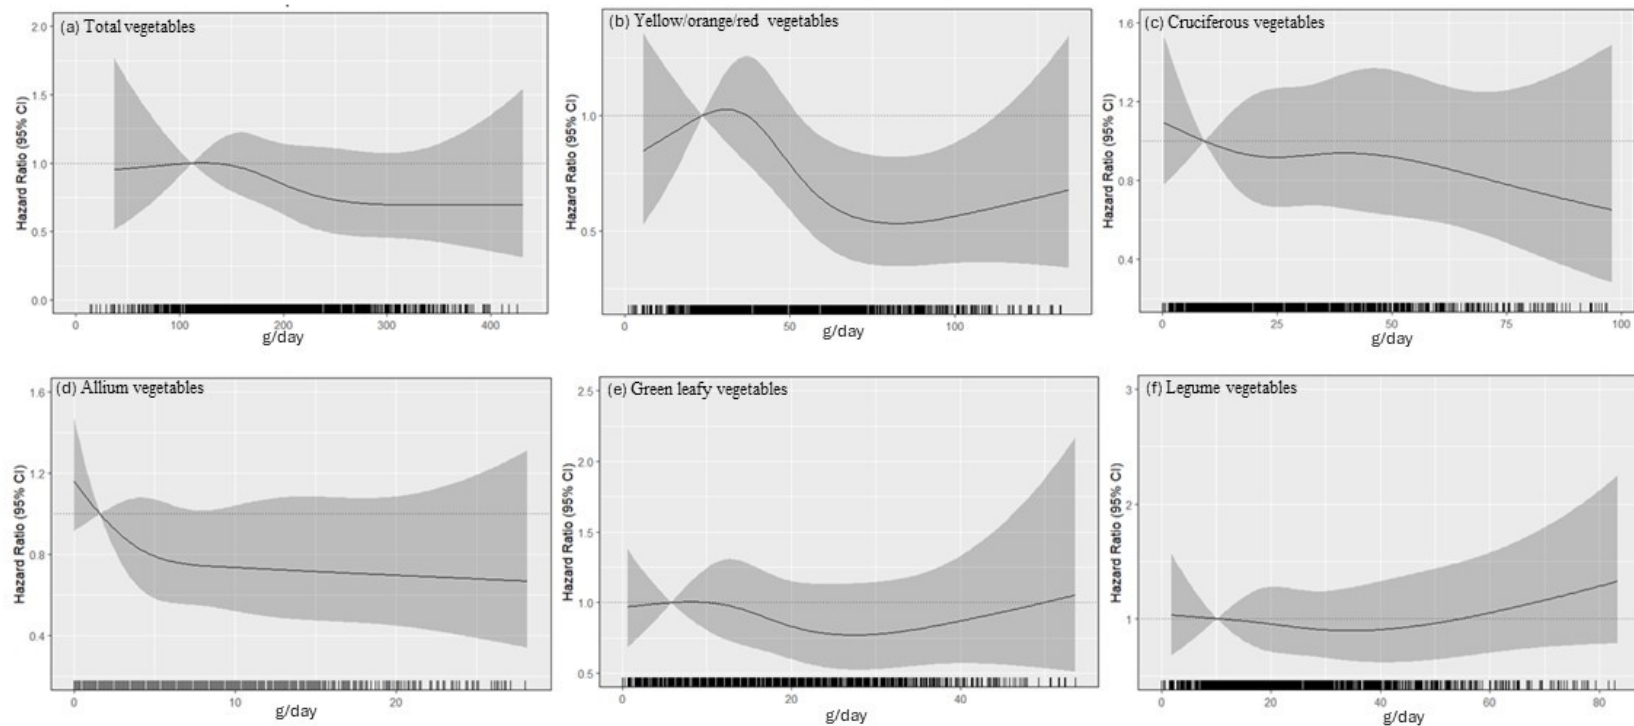

### Supple

**ntary Figure 1.** Hazard ratios (95% CI) for the relationship of the intake of (a) total vegetable, (b) yellow/orange/red vegetables, (c) cruciferous vegetables, (d) allium vegetables, (e) green leafy vegetables, and (f) legume vegetables with any late-life dementia hospitalisations over 14.5 years, multivariable-adjusted for treatment code (calcium or placebo), apolipoprotein E genotype, general Framingham Risk Score, energy intake, prescription of statin medications, use of low-dose aspirin, prevalent atherosclerotic vascular disease, physical activity, alcohol intake, and socio-economic status. Solid lines are the estimated hazard ratio and shaded areas represent the 95% CI (confidence intervals).

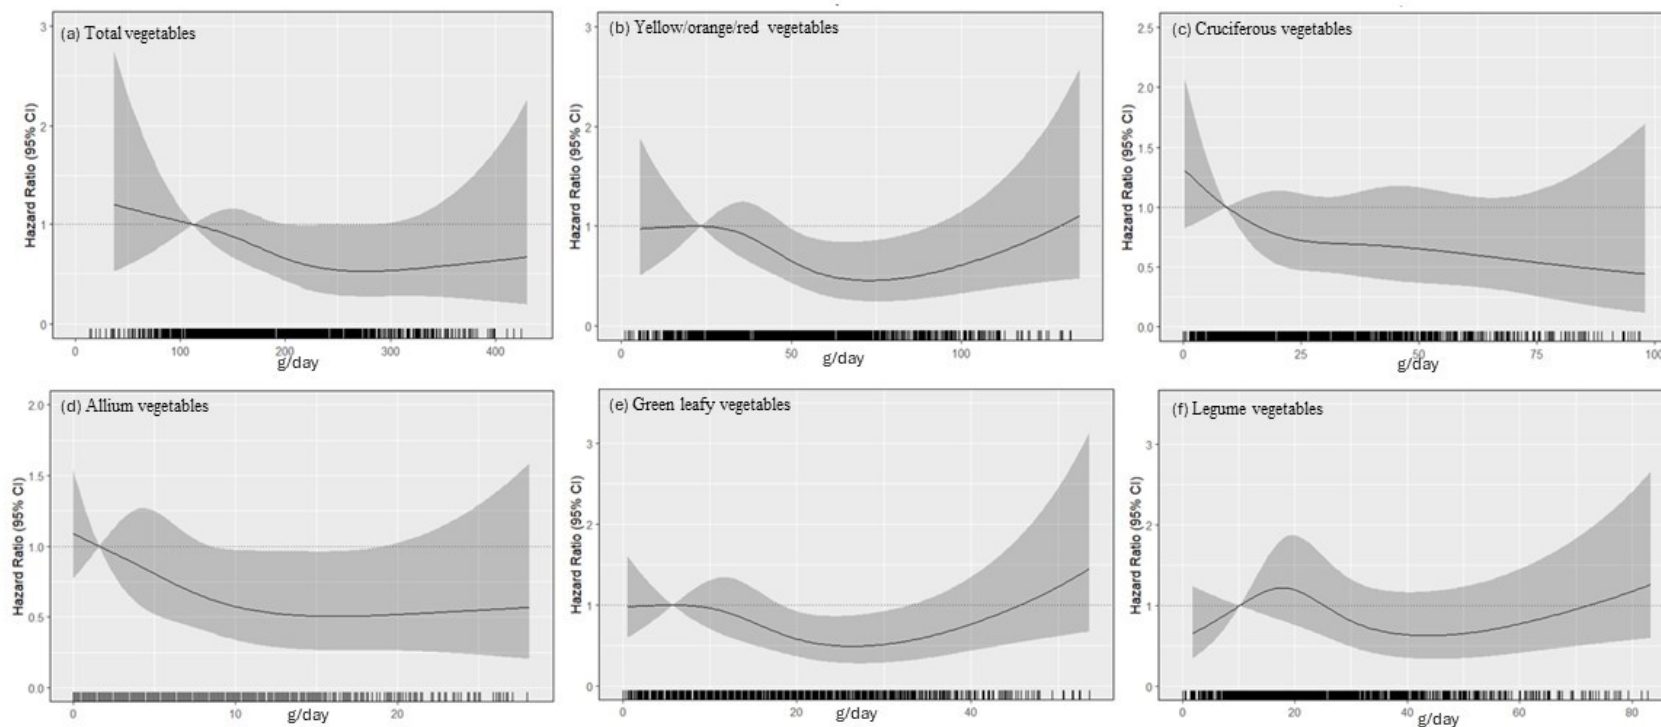

### Supple

**mentary Figure 2.** Hazard ratios (95% CI) for the relationship of the intake of (a) total vegetable, (b) yellow/orange/red vegetables, (c) cruciferous vegetables, (d) allium vegetables, (e) green leafy vegetables, and (f) legume vegetables with any late-life dementia death over 14.5 years, multivariable-adjusted for treatment code (calcium or placebo), apolipoprotein E genotype, Framingham Risk Score, energy intake, prescription of statin medications, use of low-dose aspirin, prevalent atherosclerotic vascular disease, physical activity, alcohol intake, and socio-economic status. Solid lines are the estimated hazard ratio and shaded areas represent the 95% CI (confidence intervals).
